# Supplementary material
Source: PubMed Central journal article supplement (PMC3501258)
Supplement: NIHMS402706-supplement-01.pdf [file NIHMS402706-supplement-01.pdf]

Type of file: table

Label: esi

Filename: PLA\_quantitation\_EGFR\_PDLIM1\_WT.pdf

50K seeds counted by Yen thresholding and particle count (750, 3836) particle sizes 2-5C  
 Number of Cell area (outlined and analyzed) PLA dots PLA dots/c 1e5\*PLA dots/cc

| CTRL EGFR only   |      |       |       |          |             |
|------------------|------|-------|-------|----------|-------------|
| 1                | 1    | 65964 | 1     | 1        | 1.515978412 |
| 2                | 2    | 68802 | 9     | 4.5      | 13.08101509 |
| 3                | 2.75 | 56912 | 5     | 1.818182 | 8.785493393 |
| 4                | 1    | 20640 | 8     | 8        | 38.75968992 |
| 5                | 1    | 20323 | 8     | 8        | 39.36426709 |
| CTRL PDLIM1 only |      |       |       |          |             |
| 1                | 2    | 44941 | 8     | 4        | 17.80111702 |
| 2                | 2    | 22105 | 18    | 9        | 81.42954083 |
| 3                | 3.1  | 48508 | 9     | 2.903226 | 18.55364064 |
| 4                | 3    | 49208 | 15    | 5        | 30.48284832 |
| 5                | 2    | 36928 | 9     | 4.5      | 24.37175043 |
| EGF 0min         |      |       |       |          |             |
| 1                | 1    | 22945 | 92    | 92       | 400.9588146 |
| 2                | 2    | 20793 | 75    | 37.5     | 360.6983119 |
| 3                | 1.8  | 33428 | 104   | 57.77778 | 311.1164293 |
| 4                | 2    | 37900 | 194   | 97       | 511.8733509 |
| 5                | 1    | 25506 | 42    | 42       | 164.6671371 |
| EGF 1min         |      |       |       |          |             |
| 1                | 1    | 81717 | 33    | 33       | 40.38327398 |
| 2                | 1.3  | 48525 | 69    | 53.07692 | 142.194745  |
| 3                | 2    | 44176 | 83    | 41.5     | 187.8848243 |
| 4                | 2    | 48329 | 93    | 46.5     | 192.4310455 |
| 5                | 1    | 26258 | 36    | 36       | 137.101074  |
| EGF 6min         |      |       |       |          |             |
| 1                | 1    | 17581 | 101.4 | 101.4    | 576.7590012 |
| 2                | 2    | 46781 | 208   | 104      | 444.6249546 |
| 3                | 2    | 41311 | 226   | 113      | 547.0697877 |
| 4                | 2.6  | 85928 | 292   | 112.3077 | 339.8193837 |
| 5                | 2    | 76583 | 259   | 129.5    | 338.1951608 |
| EGF 15min        |      |       |       |          |             |
| 1                | 2    | 50604 | 111   | 55.5     | 219.350249  |
| 2                | 2.15 | 37660 | 99    | 46.04651 | 262.8783856 |
| 3                | 5    | 82102 | 395   | 79       | 481.1088646 |
| 4                | 1    | 20455 | 118   | 118      | 576.8760694 |
| 5                | 2    | 33513 | 113   | 56.5     | 337.1825859 |

). For large clumps, measured area and assumed area of 10 for average PLA dot, so adder  
average/ar stdev/area

20.30129 17.619191

34.52778 26.712525

349.8628 127.25402

139.999 61.193716

449.2937 111.97865

375.4792 150.19999

d number of dots=area/10
